# Supplementary material for: Differential Studies on the Structure of Lignin–Carbohydrate Complexes (LCC) in Alkali-Extracted Plant Hemicelluloses
Source: MDPI journal article supplement (doi:10.3390/polym16101403), 2024-05-15
Supplement: s1 [file s1]

## S 1 2D-NMR HSQC signal peak attribution

| Label              | $\delta_C/\delta_H$ (ppm) | Assignment                                                                                                           |
|--------------------|---------------------------|----------------------------------------------------------------------------------------------------------------------|
| -OCH <sub>3</sub>  | 55.6/3.73                 | C-H in methoxyls                                                                                                     |
| Ara <sub>2</sub>   | 80.0/3.83                 | C <sub>2</sub> -H <sub>2</sub> in $\alpha$ -L-Arabinofuranoside                                                      |
| Ara <sub>3</sub>   | 77.7/3.63                 | C <sub>3</sub> -H <sub>3</sub> in $\alpha$ -L-Arabinofuranoside                                                      |
| Ara <sub>5</sub>   | 61.6/3.46                 | C <sub>5</sub> -H <sub>5</sub> in $\alpha$ -L-Arabinofuranoside                                                      |
| X <sub>2</sub>     | 72.5/3.02                 | C <sub>2</sub> -H <sub>2</sub> in $\beta$ -D-xylopyranoside (X)                                                      |
| X <sub>3</sub>     | 73.7/3.22                 | C <sub>3</sub> -H <sub>3</sub> in $\beta$ -D-xylopyranoside (X)                                                      |
| X <sub>4</sub>     | 101.5/4.26                | C <sub>4</sub> -H <sub>4</sub> in $\beta$ -D-xylopyranoside (X)                                                      |
| X <sub>5</sub>     | 62.6/3.72 and 3.40        | C <sub>5</sub> -H <sub>5</sub> in $\beta$ -D-xylopyranoside (X)                                                      |
| X <sub>5(nr)</sub> | 65.3/3.61 and 3.05        | C <sub>5</sub> -H <sub>5</sub> in $\beta$ -D-xylopyranoside of xylans non reducing end                               |
| Glu <sub>2</sub>   | 74.4/2.93                 | C <sub>2</sub> -H <sub>2</sub> in $\beta$ -D-glucopyranoside                                                         |
| Glu <sub>3</sub>   | 76.2/3.09                 | C <sub>3</sub> -H <sub>3</sub> in $\beta$ -D-glucopyranoside                                                         |
| Glu <sub>4</sub>   | 78.6/3.36                 | C <sub>4</sub> -H <sub>4</sub> in $\beta$ -D-glucopyranoside                                                         |
| Glc <sub>3</sub>   | 73.9/3.38                 | C <sub>3</sub> -H <sub>3</sub> correlations from anomeric positions of glucans (G)                                   |
| Glc <sub>5</sub>   | 76.3/3.20                 | C <sub>5</sub> -H <sub>5</sub> correlations from anomeric positions of glucans (G)                                   |
| U <sub>2</sub>     | 71.9/3.33                 | C <sub>2</sub> -H <sub>2</sub> in 4-O-methyl- $\alpha$ -D-GlcUA                                                      |
| U <sub>3</sub>     | 72.9/3.66                 | C <sub>3</sub> -H <sub>3</sub> in 4-O-methyl- $\alpha$ -D-GlcUA                                                      |
| U <sub>4</sub>     | 81.6/3.08                 | C <sub>4</sub> -H <sub>4</sub> in 4-O-methyl- $\alpha$ -D-GlcUA                                                      |
| A <sub>1</sub>     | 62.1~55.8/3.70~3.40       | C <sub><math>\gamma</math></sub> -H <sub><math>\gamma</math></sub> in $\beta$ -O-4 substructures (A)                 |
| A <sub>2</sub>     | 86.3/4.02                 | C <sub><math>\beta</math></sub> -H <sub><math>\beta</math></sub> in $\beta$ -O-4 substructures linked to S units (A) |
| GE                 | 62.7/4.01                 | $\gamma$ -ester linkages                                                                                             |
| PhGlc <sub>1</sub> | 100.4/5.01                | phenyl glycoside linkages                                                                                            |
| PhGlc <sub>2</sub> | 100.5/4.46                | phenyl glycoside linkages                                                                                            |
| PhGlc <sub>3</sub> | 99.53/4.75                | phenyl glycoside linkages                                                                                            |
| S <sub>2,6</sub>   | 103.9/6.69                | C <sub>2,6</sub> -H <sub>2,6</sub> in etherified syringyl units (S)                                                  |
| S' <sub>2,6</sub>  | 105.8/6.95                | C <sub>2,6</sub> -H <sub>2,6</sub> in oxidized ( $\alpha$ C=O) syringyl units (S)                                    |
| G <sub>2</sub>     | 110.8/6.96                | C <sub>2</sub> -H <sub>2</sub> in guaiacyl units (G)                                                                 |
| G <sub>5</sub>     | 115.6/6.92                | C <sub>2</sub> -H <sub>2</sub> in guaiacyl units (G)                                                                 |
| G <sub>6</sub>     | 118.1/6.96                | C <sub>6</sub> -H <sub>6</sub> in guaiacyl units (G)                                                                 |
| H <sub>2,6</sub>   | 127.8/7.22                | C <sub>2,6</sub> -H <sub>2,6</sub> in p-hydroxyphenyl units                                                          |
| H <sub>3,5</sub>   | 114.6/6.62                | C <sub>3,5</sub> -H <sub>3,5</sub> in p-hydroxyphenyl units                                                          |
| FA <sub>2</sub>    | 111.1/7.31                | C <sub>2</sub> -H <sub>2</sub> in ferulate (FA)                                                                      |
| FA <sub>6</sub>    | 120.6/7.04                | C <sub>6</sub> -H <sub>6</sub> in ferulate (FA)                                                                      |
| PCA <sub>2,6</sub> | 129.7/7.48                | C <sub>2</sub> -H <sub>2</sub> and C <sub>6</sub> -H <sub>6</sub> in p-coumarate (PCA)                               |

|                                      |            |                                                                          |
|--------------------------------------|------------|--------------------------------------------------------------------------|
| $\text{PCA}_\alpha/\text{FA}_\alpha$ | 143.9/7.47 | $\text{C}_\alpha\text{-H}_\alpha$ in p-coumarate (PCA) and ferulate (FA) |
| $\text{PCA}_\beta/\text{FA}_\beta$   | 115.2/6.27 | $\text{C}_\beta\text{-H}_\beta$ in p-coumarate (PCA) and ferulate (FA)   |

---
